# Supplementary material for: Linear growth faltering in infants is associated with Acidaminococcus sp. and community-level changes in the gut microbiota
Source: PubMed Central journal article supplement (PMC4477476; doi:10.1186/s40168-015-0089-2), 2015-06-13

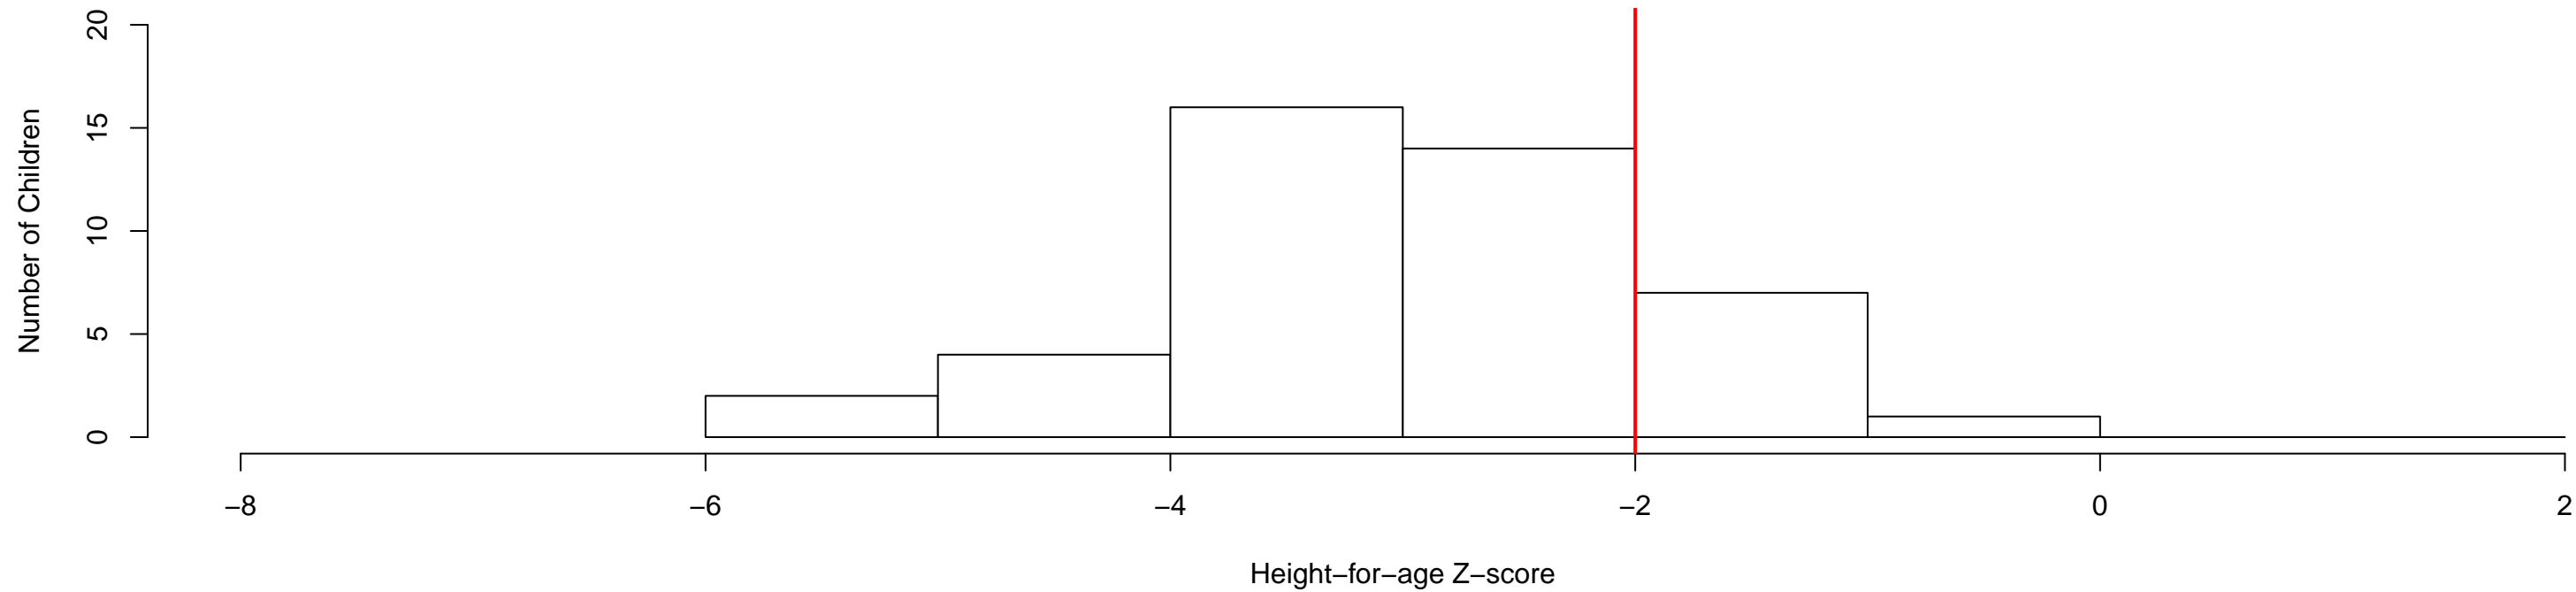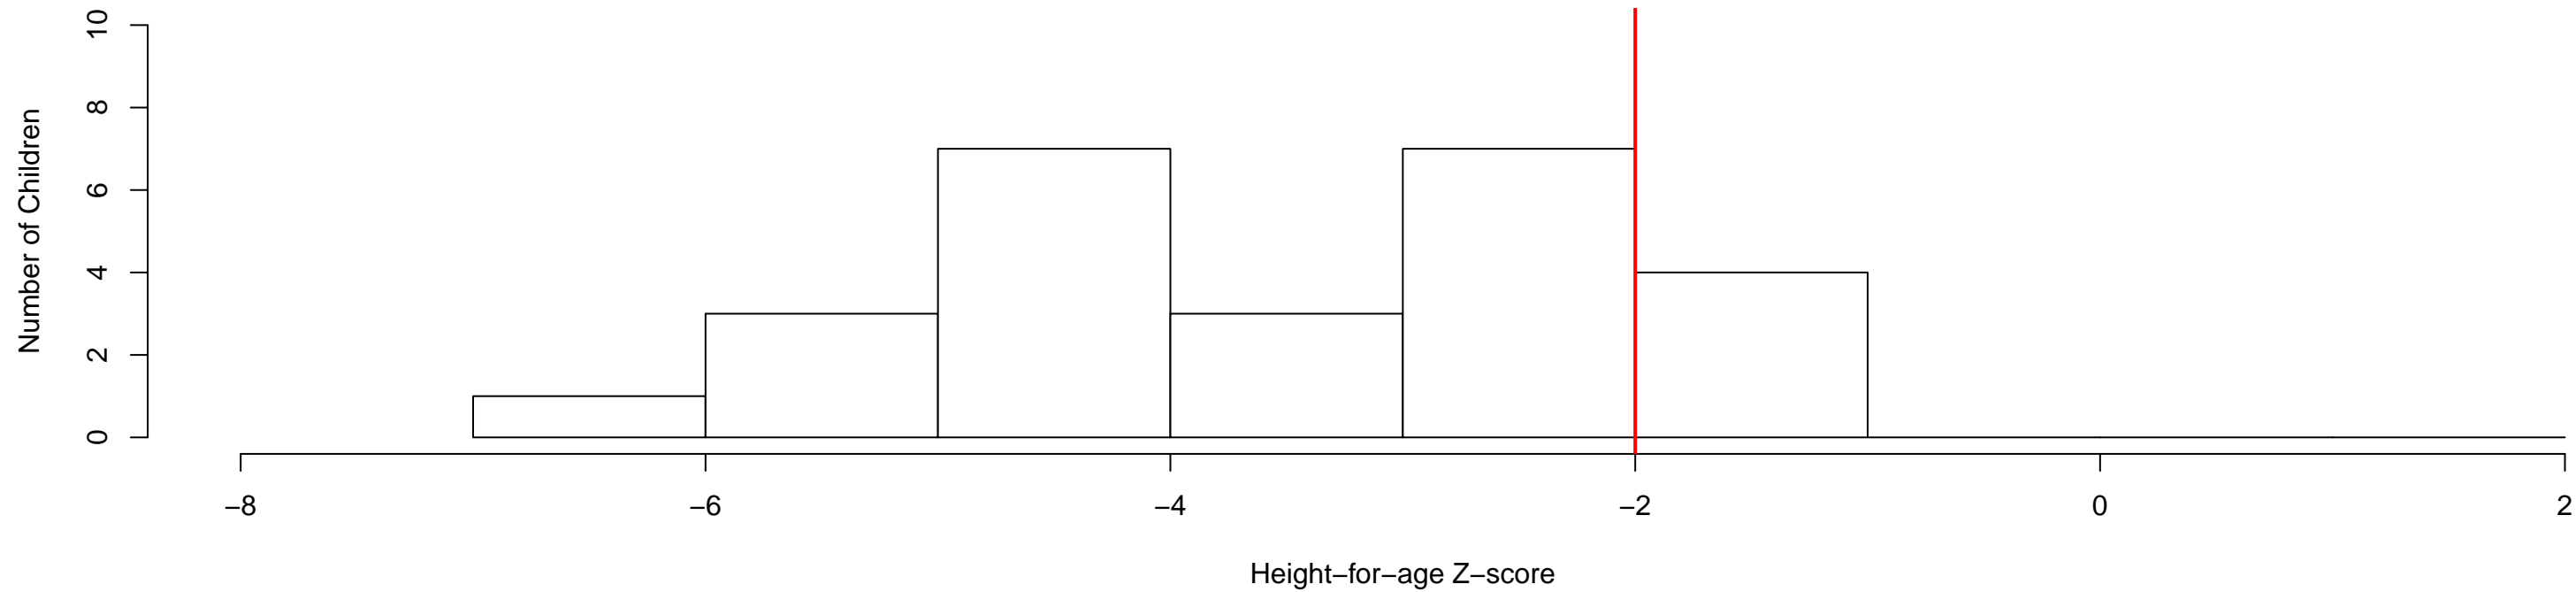

Supplement: 40168_2015_89_MOESM6_ESM.pdf [file 40168_2015_89_MOESM6_ESM.pdf]
